# Supplementary material for: Phospholipid Scramblase 4 (PLSCR4) Regulates Adipocyte Differentiation via PIP3-Mediated AKT Activation
Source: MDPI journal article supplement (doi:10.3390/ijms23179787), 2022-08-29
Supplement: s1 [file s1]

## Supplementary Figures

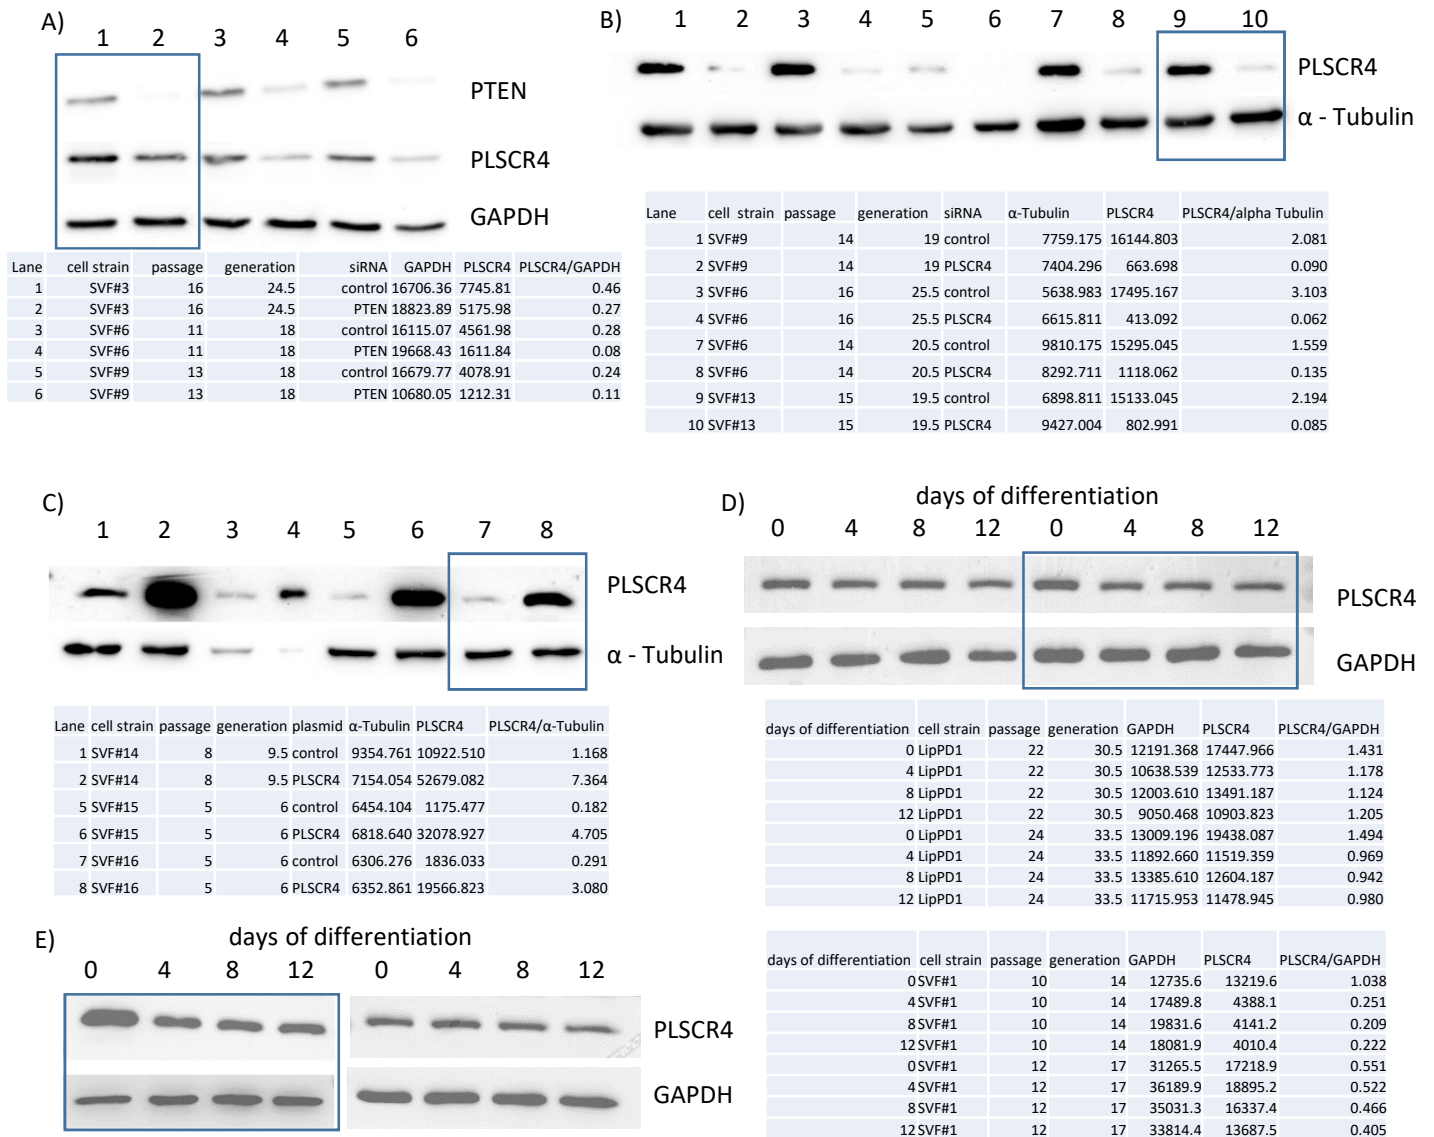

**Figure S1:** Western blots from PTEN and PLSCR4 knockdown/overexpression adipocyte progenitor cells (APCs). A) Western blots and densitometric analysis of control and PTEN siRNA transfected APCs. PTEN and PLSCR4 protein were normalized to GAPDH. B) Western blots and densitometric analysis of control and PLSCR4 siRNA transfected APCs. PLSCR4 protein was normalized to  $\alpha$ -Tubulin. Due to low basal PLSCR4 expression lanes 5 and 6 were excluded from analysis. C) Western blots and densitometric analysis of control and PLSCR4 plasmid (PLSCR4 overexpression) -transfected APCs. PLSCR4 protein was normalized to  $\alpha$ -Tubulin. Due to unequal expression of housekeeping gene  $\alpha$  - Tubulin lanes 3 and 4 were excluded from analysis. D) Western blots and densitometric analysis of PLSCR4 during adipogenesis in LipPD1 cells. PLSCR4 protein was normalized to GAPDH. E) Western blots and densitometric analysis of PLSCR4 during adipogenesis in APCs. PLSCR4 protein was normalized to GAPDH. Western blot images presented in Figures 2, 3 and 4 were reused (indicated with blue boxes).

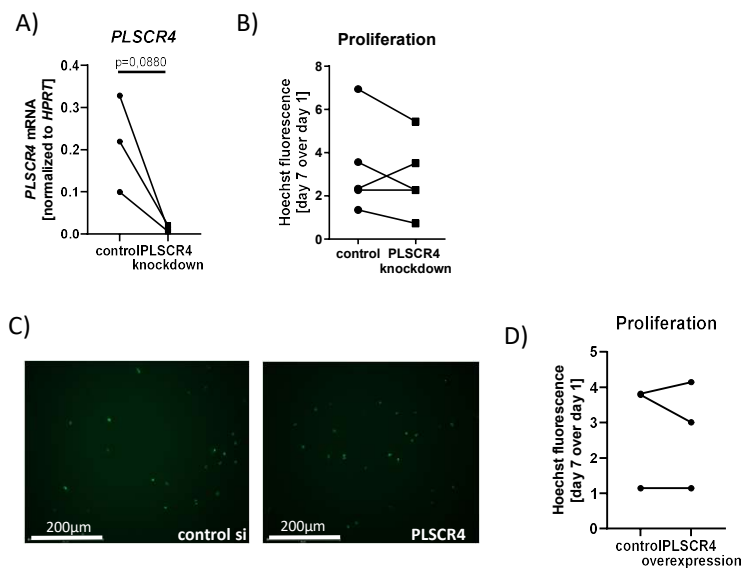

**Figure S2.** Knockdown/overexpression efficiencies in adipocyte progenitor cells (APCs), and effects on proliferation. A) qPCR of control and PLSCR4 siRNA transfected APCs: *PLSCR4* mRNA expression was downregulated  $94.0\% \pm 29.9\%$  (normalized to *HPRT*,  $n = 3$ ,  $p = 0.0880$ ). B) Hoechst nuclei staining of control and PLSCR4 siRNA: transfected APCs 7 days after transfection no significant difference in proliferation of APCs was observed ( $13.7\% \pm 14.8\%$ ,  $n = 5$ ,  $p = 0.4044$ ). C) Proliferation marker Ki-67 (green) immunofluorescence staining in control and PLSCR4 KD SVF cells showed no difference. D) Hoechst nuclei staining of control and PLSCR4 plasmid transfected APCs 7 days after transfection: no significant difference in proliferation of APCs was observed ( $5.2\% \pm 11.2\%$ ,  $n = 3$ ,  $p = 0.6910$ ). Matched results were visualized via lines between data points (control versus knockdown/overexpression). p-values were determined via paired t test ( $***p < 0.001$ ).

A)

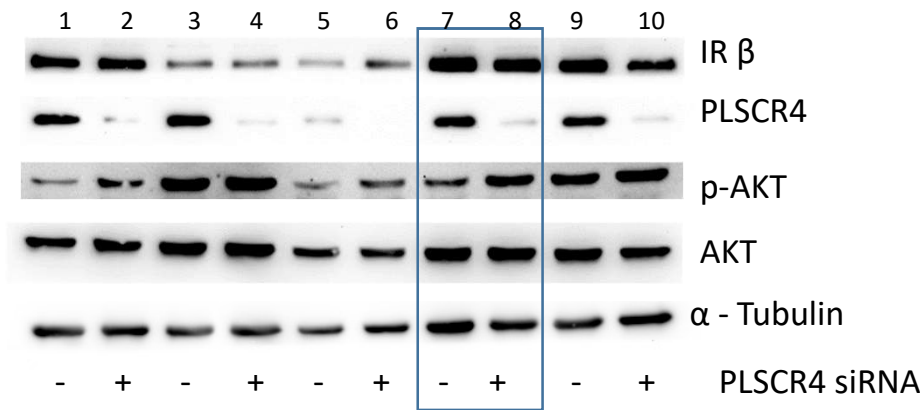

B)

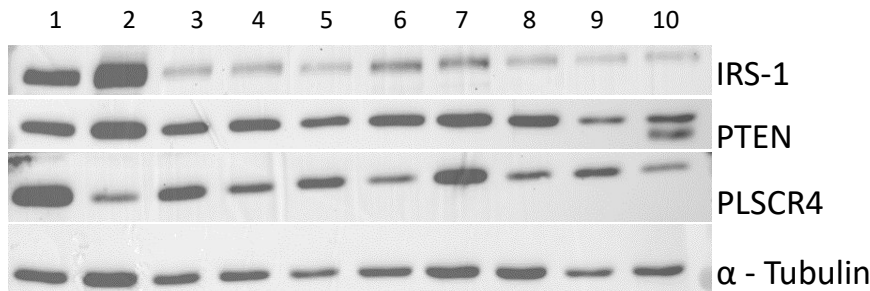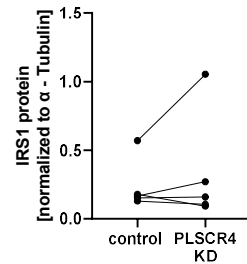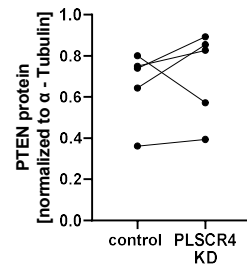

**Figure S3.** Western blots of PLSCR4 knockdown (KD) adipocyte progenitor cells (APCs). A) Insulin receptor  $\beta$  subunit (IR  $\beta$ ), and PLSCR4 were normalized to  $\alpha$ -Tubulin. Phosphorylated AKT (pAKT T308) was normalized to total AKT protein. AKT phosphorylation in PLSCR4 KD cells was increased by  $52.0\% \pm 13.6\%$  compared to control cells ( $n = 5$ ,  $p = 0.0186$ ). IR  $\beta$  subunit expression was variable between control cells and PLSCR4 KD cells and showed no regulation ( $n = 5$ ,  $p = 0.3283$ ). B) Insulin receptor substrate 1 (IRS-1), PTEN and PLSCR4 were normalized to  $\alpha$ -Tubulin. IRS-1 ( $n = 5$ ,  $p = 0.3931$ ) and PTEN ( $n = 5$ ,  $p = 0.5500$ ) expression was not significantly different between control and PLSCR4 KD cells. Western blot images presented in Figure 5 were reused (indicated with blue boxes).

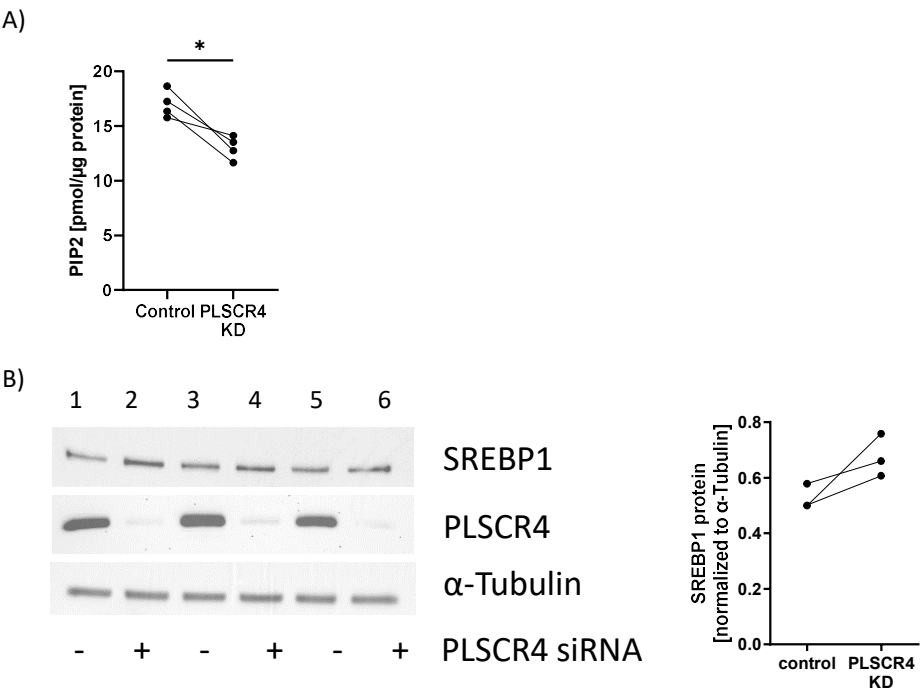

| Lane | cell strain | passage | generation | siRNA   | α-Tubulin | PLSCR4  | SREBP1  | PLSCR4/α-Tubulin | SREBP1/α-Tubulin |
|------|-------------|---------|------------|---------|-----------|---------|---------|------------------|------------------|
| 1    | SVF#1       | 22      | 29         | control | 17381.1   | 28227.7 | 8693    | 1.62             | 0.5              |
| 2    | SVF#1       | 22      | 29         | PTEN    | 18438     | 1817.7  | 13988.7 | 0.1              | 0.76             |
| 3    | SVF#9       | 11      | 36.5       | control | 17579.8   | 25842.3 | 10168.6 | 1.47             | 0.58             |
| 4    | SVF#9       | 11      | 36.5       | PTEN    | 18445.2   | 2092.1  | 12164.9 | 0.11             | 0.66             |
| 5    | SVF#10      | 31      | 36         | control | 17358.3   | 13942.5 | 8705.4  | 0.8              | 0.5              |
| 6    | SVF#10      | 31      | 36         | PTEN    | 18349.9   | 346.2   | 11144   | 0.02             | 0.61             |

**Figure S4.** A) Amount of PIP2 in control and PLSCR4 KD APCs as determined via high pressure liquid chromatography-mass spectrometry (HPLC-MS). PIP2 levels decreased by  $23.1 \pm 4.7\%$  in PLSCR4 KD cells ( $n = 4$ ,  $p = 0.0215$ ). B) Western blots of PLSCR4 knockdown (KD) adipocyte progenitor cells (APCs). Sterol regulatory element-binding protein 1 (SREBP1) and PLSCR4 were normalized to  $\alpha$ -Tubulin. SREBP1 expression was elevated in PLSCR4 KD cells by  $28.9\% \pm 11.6\%$  compared to control cells ( $n = 3$ ,  $p = 0.116$ ). p-values for the experiments were determined via paired t-test ( $*p < 0.05$ ). PLSCR4, phospholipid scramblase 4.

Supplementary Tables

Table S1: Distance matrix of the PLSCR genes from Human, Chimpanzee, and Mouse species.

| PLSCR1 |       |            |   | PLSCR2 |       |            |  | PLSCR3 |       |            |  | PLSCR4 |       |            |  | PLSCR5 |       |            |        |
|--------|-------|------------|---|--------|-------|------------|--|--------|-------|------------|--|--------|-------|------------|--|--------|-------|------------|--------|
| Human  | Mouse | Chimpanzee |   | Human  | Mouse | Chimpanzee |  | Human  | Mouse | Chimpanzee |  | Human  | Mouse | Chimpanzee |  | Human  | Mouse | Chimpanzee |        |
| 0      |       | 0          | 0 | 16     | 24.68 | 24.57      |  | 46.4   | 45.8  | 49.49      |  | 51.63  | 50.5  | 48.99      |  | 40.38  | 42.96 | 45.19      | PLSCR1 |
|        |       |            |   | 0      | 0     | 0          |  | 46.67  | 49.64 | 48.71      |  | 50     | 52.88 | 51.97      |  | 38.67  | 45.98 | 45.34      | PLSCR2 |
|        |       |            |   |        |       |            |  | 0      | 0     | 0          |  | 59.71  | 61.19 | 59.15      |  | 52.85  | 53.28 | 52.94      | PLSCR3 |
|        |       |            |   |        |       |            |  |        |       |            |  | 0      | 0     | 0          |  | 56.93  | 57.03 | 60.08      | PLSCR4 |
|        |       |            |   |        |       |            |  |        |       |            |  |        |       |            |  | 0      | 0     | 0          | PLSCR5 |

The distance is calculated based on the formula, Distance Score = m/(npos + gaps\*gap\_penalty), where m = score of matches (1 for an exact match, 0 for no match), npos = the number of positions included in m, gaps = number of gaps in the sequences, and gap\_penalty = the score given to a gapped position (value set as Zero). The distances are expressed in terms of the number of substitutions per 100 amino acids and a score of Zero indicates 100 % similarity.

Table S2: Primers used for RT-qPCR

| Gene           | Forward                             | Reverse                           | Probe                                 |
|----------------|-------------------------------------|-----------------------------------|---------------------------------------|
| <i>hTBP</i>    | TTG TAA ACT TGA CCT AAA GAC CAT TGC | TTC GTG GCT CTC TTA TCC TCA TG    | AAC GCC GAA TAT AAT CCC AAG CGG TTT G |
| <i>hHPRT</i>   | GGC AGT ATA ATC CAA AGA TGG TCA A   | GTC TGG CTT ATA TCC AAC ACT TCG T | CAA GCT TGC TGG TGA AAA GGA CCC C     |
| <i>hPTEN</i>   | TGTAAAGCTGGAAAGGGACGA               | GGAATAGTTACTCCCTTTTGTCTC          |                                       |
| <i>hPLSCR4</i> | CAGTACAAC TAGACCCGGCG               | CCAGGGGGTCCTGGTAAAAA              |                                       |
| <i>mHprt</i>   | TCCTCCTCAGACCGCTTTT                 | CATAACCTGGTTCATCATCGC             |                                       |
| <i>mTbp</i>    | GGGTATCTGCTGGCGGTTT                 | TGAAATAGTGATGCTGGGCACT            |                                       |
| <i>mPTEN</i>   | TCCCAGACATGACAGCCATC                | TGCTTTGAATCCAAAAACCTTACT          |                                       |
| <i>mPlscr4</i> | AAATGTCAGGTCTGGTCCCCA               | AGAAGGAGAGGCAACTGGTC              |                                       |

Table S3: Western blot (Wb) antibodies

| Primary antibody                               | Dilution                    | Distributor    | Cat.No.   |
|------------------------------------------------|-----------------------------|----------------|-----------|
| AKT antibody Rabbit polyclonal Ab              | 1:1000 TBS-T 5%BSA (Wb)     | CST            | #9272     |
| Phospho-AKT (Thr308) (224F9) Rabbit mAb        | 1:1000 TBS-T 5%BSA (Wb)     | CST            | #4056     |
| alpha Tublin (11H10) Rabbit mAb                | 1:2000 TBS-T 5%BSA (Wb)     | CST            | #2125     |
| GAPDH (6C5) Mouse mAb                          | 1:50,000 TBS-T 5% milk (Wb) | Merck          | MAB374    |
| PTEN ( 138G6) Rabbit map                       | 1:1000 TBS-T 5%BSA (Wb)     | CST            | #9559     |
| Insulin Receptor beta (4B8) Rabbit mAb         | 1:500 TBS-T 5%BSA (Wb)      | Cell Signaling | 3025S     |
| IRS-1 antibody Rabbit mAb                      | 1:1000 TBS-T 5%BSA (Wb)     | Cell Signaling | 2382S     |
| Anti PLSCR4 antibody Rabbit polyclonal Ab      | 1:1000 TBS-T 5%BSA (Wb)     | Abcam          | ab 233005 |
| Secondary antibody                             | Dilution                    | Distributor    | Cat.No.   |
| Polyclonal goat anti-rabbit immunoglobulin/HRP | 1:2000 TBS-T 5% milk (Wb)   | Dako           | P0447     |
| Polyclonal goat anti-mouse immunoglobulin/HRP  | 1:2000 TBS-T 5% milk (Wb)   | Dako           | P0448     |
